# Supplementary material
Source: Springer Nature journal article supplement (https://www.springermedizin.de/resource/supplementary/13075_2010_3027_MOESM6_ESM.pdf/9693368)

(a)

C57BL/6

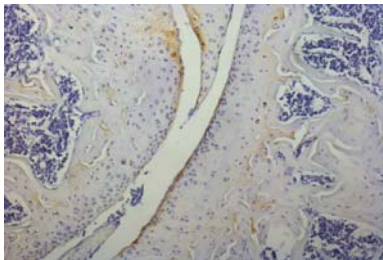

u-PA-/-

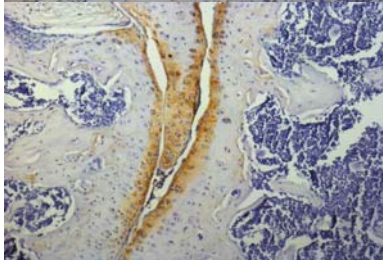

(b)

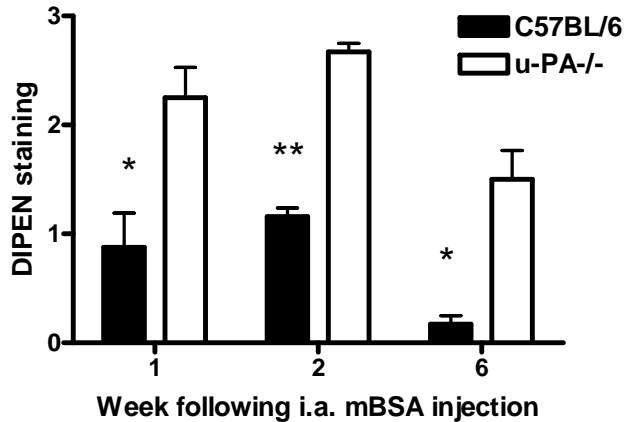

Supplement: MOESM6 [file 9693368]
